# Supplementary material for: Latitude- and depth-driven divergence in protist trophic strategies revealed by a machine learning model
Source: Front Microbiol. 2025 Sep 1;16:1602162. doi: 10.3389/fmicb.2025.1602162 (PMC12434009; doi:10.3389/fmicb.2025.1602162)
Supplement: Supplementary file 2 [file Table_1.xlsx]

## Sheet: trainingLabels_newContamination
Species	MMETSP ID	Trophic mode	Other factors	Reference
Ochromonas sp. CCMP1393	MMETSP0004	Mix	NA	Nutritional characteristics of a mixotrophic nanoflagellate, Ochromonas sp. 1989. Andersson et al. Microbial Ecology.
Ochromonas sp. CCMP1393	MMETSP0005	Het	Dark	Nutritional characteristics of a mixotrophic nanoflagellate, Ochromonas sp. 1989. Andersson et al. Microbial Ecology.
Prymnesium parvum Texoma1	MMETSP0006	Phot	Ax	NA
Chlamydomonas euryale CCMP219	MMETSP0063	Phot	NA	NA
Chaetoceros affinis CCMP159	MMETSP0090	Phot	NA	NA
Prorocentrum minimum, Strain CCMP1329	MMETSP0057	Phot	Ax	NA
Pyramimonas parkeae CCMP726	MMETSP0059	Phot	Ax	NA
Chaetoceros affinis CCMP159	MMETSP0091	Phot	NA	NA
Prymnesium parvum Texoma1	MMETSP0007	Phot	Ax	NA
Grammatophora oceanica CCMP 410	MMETSP0009	Phot	NA	NA
Corethron hystrix 308	MMETSP0010	Phot	NA	NA
Rhodosorus marinus CCMP 769	MMETSP0011	Phot	NA	Effect of photon fluence rate, nitrogen limitation and nitrogen recovery on the level of phycoerythrin in the unicellular alga, Rhodosorus marinus (Rhodophyceae). 1994. Dupre et al. Physiologia Plantarum.
Skeletonema costatum 1716	MMETSP0013	Phot	NA	NA
Nitszchia sp. RCC80	MMETSP0014	Phot	NA	NA
Odontella aurita isolate 1302-5	MMETSP0015	Phot	NA	NA
Cylindrotheca closterium KMMCC:B-181	MMETSP0017	Phot	NA	NA
Dinobryon sp. UTEXLB2267	MMETSP0019	Mix	NA	Light-dependent phagotrophy in the freshwater mixotrophic chrysophyte Dinobryon cylindricum. 1993. Caron et al. Microbial Ecology.
Dinobryon sp. UTEXLB2267	MMETSP0020	Het	Dark	Light-dependent phagotrophy in the freshwater mixotrophic chrysophyte Dinobryon cylindricum. 1993. Caron et al. Microbial Ecology.
Karenia brevis CCMP2229	MMETSP0027	Mix	NA	Grazing by Karenia brevis on Synechococcus enhances its growth rate and may help to sustain blooms. 2009. Gilbert et al. AME.
Karenia brevis CCMP2229	MMETSP0029	Mix	NA	Grazing by Karenia brevis on Synechococcus enhances its growth rate and may help to sustain blooms. 2009. Gilbert et al. AME.
Karenia brevis CCMP2229	MMETSP0030	Mix	NA	Grazing by Karenia brevis on Synechococcus enhances its growth rate and may help to sustain blooms. 2009. Gilbert et al. AME.
Karenia brevis CCMP2229	MMETSP0031	Mix	NA	Grazing by Karenia brevis on Synechococcus enhances its growth rate and may help to sustain blooms. 2009. Gilbert et al. AME.
Nephroselmis pyriformis CCMP717	MMETSP0034	Mix	NA	Mixotrophy in Chlorophytes and Haptophytes‚ Effect of Irradiance, Macronutrient, Micronutrient and Vitamin Limitation. 2018. Anderson et al. Front. Microbiol.
Cryptomonas paramecium CCAP977/2a	MMETSP0038	Het	NA	Insight into the Diversity and Evolution of the Cryptomonad Nucleomorph Genome. 2005. Lane et al. Mol. Bio. Evol.
Eutreptiella gymnastica NIES-381	MMETSP0039	Phot	Ax	NA
Lotharella oceanica CCMP622	MMETSP0040	Phot	Ax	NA
Lotharella globosa LEX01	MMETSP0041	Phot	Ax	NA
Lotharella amoebiformis CCMP2058	MMETSP0042	Phot	Ax	NA
Bigelowiella natans CCMP 2755	MMETSP0045	Phot	Ax	NA
Guillardia theta CCMP 2712	MMETSP0046	Phot	NA	The Plastid Genome of the Cryptophyte Alga, Guillardia theta: Complete Sequence and Conserved Synteny Groups Confirm Its Common Ancestry with Red Algae. 1999. Douglas and Penny. J. Mol. Evolution.
Polytomella parva SAG 63-3	MMETSP0052	Phot	Ax	NA
Prorocentrum minimum, Strain CCMP1329	MMETSP0053	Phot	Ax	NA
Prorocentrum minimum, Strain CCMP1329	MMETSP0055	Phot	Ax	NA
Prorocentrum minimum, Strain CCMP1329	MMETSP0056	Phot	Ax	NA
Pyramimonas parkeae CCMP726	MMETSP0058	Phot	Ax	NA
Pteridomonas danica PT	MMETSP0101	Het	NA	Vestigial Chloroplasts in Heterotrophic Stramenopiles Pteridomonas danica and Ciliophrys infusionum (Dictyochophyceae). 2002. Sekiguchi et al. Protist.
Pteridomonas danica PT	MMETSP0102	Het	NA	Vestigial Chloroplasts in Heterotrophic Stramenopiles Pteridomonas danica and Ciliophrys infusionum (Dictyochophyceae). 2002. Sekiguchi et al. Protist.
Chlorarachnion reptans CCCM449	MMETSP0109	Mix	NA	Cytology and ultrastructure of Chlorarachnion reptans (Chlorarachniophyta divisio nova, Chlorarachniophyceae classis nova). 1984. Hibberd and Norris. J. Phycol.
Goniomonas sp m	MMETSP0114	Het	NA	Genetic diversity of goniomonads: an ancient divergence between marine and freshwater species. 2004. Von der Heyden et al. Eur. J. Phycol.
Pseudo-nitzschia australis 10249 10 AB	MMETSP0139	Phot	NA	NA
Pseudo-nitzschia australis 10249 10 AB	MMETSP0140	Phot	NA	NA
Pseudo-nitzschia australis 10249 10 AB	MMETSP0141	Phot	NA	NA
Pseudo-nitzschia australis 10249 10 AB	MMETSP0142	Phot	NA	NA
Chrysochromulina polylepis CCMP1757	MMETSP0143	Phot	Ax	NA
Chrysochromulina polylepis CCMP1757	MMETSP0145	Phot	Ax	NA
Chrysochromulina polylepis CCMP1757	MMETSP0146	Phot	Ax	NA
Chrysochromulina polylepis CCMP1757	MMETSP0147	Phot	Ax	NA
Chaetoceros debilis MM31A-1	MMETSP0149	Phot	NA	NA
Chaetoceros debilis MM31A-1	MMETSP0150	Phot	NA	NA
Thalassiothrix antarctica L6-D1	MMETSP0152	Phot	NA	NA
Thalassiothrix antarctica L6-D1	MMETSP0154	Phot	NA	NA
Thalassionema nitzschioides L26-B	MMETSP0156	Phot	NA	NA
Thalassionema nitzschioides L26-B	MMETSP0158	Phot	NA	NA
Odontella Sinensis Grunow 1884	MMETSP0160	Phot	NA	NA
Vannella robusta, Strain DIVA3 518/3/11/1/6	MMETSP0166	Het	NA	NA
Rhodella maculata CCMP736	MMETSP0167	Phot	NA	A note on the nutrition of Rhodella. 1970. Turner. British Phycol. J.
Corethron pennatum L29A3	MMETSP0169	Phot	NA	NA
Corethron pennatum L29A3	MMETSP0171	Phot	NA	NA
Proboscia alata PI-D3	MMETSP0174	Phot	NA	NA
Proboscia alata PI-D3	MMETSP0176	Phot	NA	NA
Rosalina sp.	MMETSP0190	Het	NA	NA
Thraustochytrium sp. LLF1b	MMETSP0198	Het	NA	NA
Thraustochytrium sp. LLF1b	MMETSP0199	Het	NA	NA
Chaetoceros sp. GSL56	MMETSP0200	Phot	NA	NA
Karenia brevis Wilson	MMETSP0201	Mix	NA	Grazing by Karenia brevis on Synechococcus enhances its growth rate and may help to sustain blooms. 2009. Gilbert et al. AME.
Karenia brevis Wilson	MMETSP0202	Mix	NA	Grazing by Karenia brevis on Synechococcus enhances its growth rate and may help to sustain blooms. 2009. Gilbert et al. AME.
Condylostoma magnum COL2	MMETSP0210	Het	NA	Microzooplankton feeding behaviour: grazing on the microbial and the classical food web of African soda lakes. 2013. Burien et al. Hydrobiologia.
Polarella glacialis CCMP 1383	MMETSP0227	Phot	NA	Heat shock effects and population survival in the polar dinoflagellate Polarella glacialis. 2012. Zheng et al. J. Exp. Mar. Bio. And Ecol.
Protoceratium reticulatum CCCM 535 (=CCMP 1889)	MMETSP0228	Mix	NA	Phagotrophy in Harmful Algae. 2006. Stoecker et al. Ecological Studies.
Amphidinium carterae CCMP1314	MMETSP0258	Phot	NA	Nutritional Strategies in Dinoflagellates A Review with Emphasis on Cell Biological Aspects. 1992. Schnepf and Elbrächter. Europ. J. Protistol.
Amphidinium carterae CCMP1314	MMETSP0259	Phot	NA	Nutritional Strategies in Dinoflagellates A Review with Emphasis on Cell Biological Aspects. 1992. Schnepf and Elbrächter. Europ. J. Protistol.
Prorocentrum minimum CCMP2233	MMETSP0267	Mix	NA	Phagotrophy in Harmful Algae. 2006. Stoecker et al. Ecological Studies.
Prorocentrum minimum CCMP2233	MMETSP0268	Mix	NA	Phagotrophy in Harmful Algae. 2006. Stoecker et al. Ecological Studies.
Prorocentrum minimum CCMP2233	MMETSP0269	Mix	NA	Phagotrophy in Harmful Algae. 2006. Stoecker et al. Ecological Studies.
Scrippsiella trochoidea CCMP3099	MMETSP0270	Mix	NA	Phagotrophy in Harmful Algae. 2006. Stoecker et al. Ecological Studies.
Scrippsiella trochoidea CCMP3099	MMETSP0271	Mix	NA	Phagotrophy in Harmful Algae. 2006. Stoecker et al. Ecological Studies.
Scrippsiella trochoidea CCMP3099	MMETSP0272	Mix	NA	Phagotrophy in Harmful Algae. 2006. Stoecker et al. Ecological Studies.
Chrysochromulina polylepis UIO037	MMETSP0286	Phot	Ax	NA
Chromera velia CCMP2878	MMETSP0290	Phot	NA	Chromera velia: The Missing Link in the Evolution of Parasitism. 2013. Weatherby and Carter. Adv. Appl. Microbiol.
Heterosigma akashiwo CCMP2393	MMETSP0292	Mix	NA	Phagotrophy in Harmful Algae. 2006. Stoecker et al. Ecological Studies.
Heterosigma akashiwo CCMP2393	MMETSP0294	Mix	NA	Phagotrophy in Harmful Algae. 2006. Stoecker et al. Ecological Studies.
Heterosigma akashiwo CCMP2393	MMETSP0295	Mix	NA	Phagotrophy in Harmful Algae. 2006. Stoecker et al. Ecological Studies.
Heterosigma akashiwo CCMP2393	MMETSP0296	Mix	NA	Phagotrophy in Harmful Algae. 2006. Stoecker et al. Ecological Studies.
Porphyridium aerugineum SAG 1380-2	MMETSP0313	Phot	NA	Light intensity adaptation of the phycobiliprotein content of the red alga Porphyridium. 1984. Jahn et al. Planta.
Rhodosorus marinus UTEX LB 2760	MMETSP0315	Phot	NA	Effect of photon fluence rate, nitrogen limitation and nitrogen recovery on the level of phycoerythrin in the unicellular alga, Rhodosorus marinus (Rhodophyceae). 1994. Dupre et al. Physiologia Plantarum.
Amphora coffeaeformis CCMP127	MMETSP0316	Phot	NA	NA
Amphora coffeaeformis CCMP127	MMETSP0317	Phot	NA	NA
Amphora coffeaeformis CCMP127	MMETSP0318	Phot	NA	NA
Skeletonema marinoi SM1012Hels-07	MMETSP0319	Phot	NA	NA
Skeletonema marinoi SM1012Den-03	MMETSP0320	Phot	NA	NA
Leptocylindrus danicus var. danicus B650	MMETSP0321	Phot	NA	NA
Leptocylindrus danicus var. apora B651	MMETSP0322	Phot	NA	NA
Pseudo-nitzschia delicatissima B596	MMETSP0327	Phot	NA	NA
Alexandrium tamarense, Strain CCMP1771	MMETSP0378	Phot	Ax	NA
Alexandrium tamarense CCMP1771	MMETSP0380	Phot	Ax	NA
Alexandrium tamarense CCMP1771	MMETSP0382	Phot	Ax	NA
Cyclophora tenuis ECT3854	MMETSP0397	Phot	NA	NA
Thalassiosira rotula CCMP3096	MMETSP0403	Phot	NA	NA
Thalassiosira rotula CCMP3096	MMETSP0404	Phot	NA	NA
Heterosigma akashiwo CCMP3107	MMETSP0409	Mix	NA	Phagotrophy in Harmful Algae. 2006. Stoecker et al. Ecological Studies.
Heterosigma akashiwo CCMP3107	MMETSP0410	Mix	NA	Phagotrophy in Harmful Algae. 2006. Stoecker et al. Ecological Studies.
Heterosigma akashiwo CCMP3107	MMETSP0411	Mix	NA	Phagotrophy in Harmful Algae. 2006. Stoecker et al. Ecological Studies.
Filamoeba nolandi NC-AS-23-1	MMETSP0413	Het	NA	NA
Heterosigma akashiwo NB	MMETSP0414	Mix	NA	Phagotrophy in Harmful Algae. 2006. Stoecker et al. Ecological Studies.
Heterosigma akashiwo NB	MMETSP0415	Mix	NA	Phagotrophy in Harmful Algae. 2006. Stoecker et al. Ecological Studies.
Heterosigma akashiwo NB	MMETSP0416	Mix	NA	Phagotrophy in Harmful Algae. 2006. Stoecker et al. Ecological Studies.
Mayorella sp BSH-02190019	MMETSP0417	Het	NA	NA
Astrosyne radiata 13vi08-1A	MMETSP0418	Phot	NA	NA
Heterocapsa triquestra CCMP 448	MMETSP0448	Mix	NA	Phagotrophy in Harmful Algae. 2006. Stoecker et al. Ecological Studies.
Oxyrrhis marina CCMP1795	MMETSP0451	Het	NA	Dynamics of herbivorous grazing by the heterotrophic dinoflagellate oxyrrhis marina. 1989. Goldman et al. J. Plankton Res.
Oxyrrhis marina	MMETSP0468	Het	NA	Dynamics of herbivorous grazing by the heterotrophic dinoflagellate oxyrrhis marina. 1989. Goldman et al. J. Plankton Res.
Oxyrrhis marina	MMETSP0470	Het	NA	Dynamics of herbivorous grazing by the heterotrophic dinoflagellate oxyrrhis marina. 1989. Goldman et al. J. Plankton Res.
Oxyrrhis marina	MMETSP0471	Het	NA	Dynamics of herbivorous grazing by the heterotrophic dinoflagellate oxyrrhis marina. 1989. Goldman et al. J. Plankton Res.
Rhodomonas lens RHODO	MMETSP0484	Phot	NA	Phycobiliprotein diffusion in chloroplasts of cryptophyte Rhodomonas CS24. 2009. Mirkovic et al. Photosynthesis Res.
Tetraselmis chuii PLY429	MMETSP0491	Phot	NA	Photoperiod and light intensity effects on growth and utilization of nutrients by the aquaculture feed microalga, Tetraselmis chui (PLY429). 2005. Meseck et al. Aquaculture.
Thalassiosira gravida GMp14c1	MMETSP0492	Phot	NA	NA
Thalassiosira gravida GMp14c1	MMETSP0493	Phot	NA	NA
Thalassiosira gravida GMp14c1	MMETSP0494	Phot	NA	NA
Heterocapsa rotundata SCCAP K-0483	MMETSP0503	Mix	NA	Mixotrophy in Heterocapsa rotundata: A mechanism for dominating the winter phytoplankton. 2016. Millette et al. Limnol. Oceanogr.
Karenia brevis SP3	MMETSP0527	Mix	NA	Grazing by Karenia brevis on Synechococcus enhances its growth rate and may help to sustain blooms. 2009. Gilbert et al. AME.
Karenia brevis SP3	MMETSP0528	Mix	NA	Grazing by Karenia brevis on Synechococcus enhances its growth rate and may help to sustain blooms. 2009. Gilbert et al. AME.
Skeletonema dohrnii SkelB	MMETSP0562	Phot	NA	NA
Skeletonema dohrnii SkelB	MMETSP0563	Phot	NA	NA
Karenia brevis SP1	MMETSP0573	Mix	NA	Grazing by Karenia brevis on Synechococcus enhances its growth rate and may help to sustain blooms. 2009. Gilbert et al. AME.
Karenia brevis SP1	MMETSP0574	Mix	NA	Grazing by Karenia brevis on Synechococcus enhances its growth rate and may help to sustain blooms. 2009. Gilbert et al. AME.
Skeletonema grethea CCMP 1804	MMETSP0578	Phot	NA	NA
Dactyliosolen fragilissimus	MMETSP0580	Phot	NA	NA
Skeletonema japonicum CCMP2506	MMETSP0593	Phot	NA	NA
Skeletonema menzelii CCMP793	MMETSP0603	Phot	NA	NA
Skeletonema menzelii CCMP793	MMETSP0604	Phot	NA	NA
Karenia brevis Wilson	MMETSP0648	Mix	NA	Grazing by Karenia brevis on Synechococcus enhances its growth rate and may help to sustain blooms. 2009. Gilbert et al. AME.
Karenia brevis Wilson	MMETSP0649	Mix	NA	Grazing by Karenia brevis on Synechococcus enhances its growth rate and may help to sustain blooms. 2009. Gilbert et al. AME.
Extubocellulus spinifer CCMP396	MMETSP0696	Phot	NA	NA
Extubocellulus spinifer CCMP396	MMETSP0697	Phot	NA	NA
Extubocellulus spinifer CCMP396	MMETSP0698	Phot	NA	NA
Extubocellulus spinifer CCMP396	MMETSP0699	Phot	NA	NA
Asterionellopsis glacialis CCMP134	MMETSP0705	Phot	NA	NA
Asterionellopsis glacialis CCMP134	MMETSP0706	Phot	NA	NA
Asterionellopsis glacialis CCMP134	MMETSP0707	Phot	NA	NA
Asterionellopsis glacialis CCMP134	MMETSP0708	Phot	NA	NA
Asterionellopsis glacialis	MMETSP0713	Phot	NA	NA
Chaetoceros curvisetus	MMETSP0718	Phot	NA	NA
Chaetoceros curvisetus	MMETSP0719	Phot	NA	NA
Amphiprora sp. CCMP467	MMETSP0724	Phot	NA	NA
Amphiprora sp. CCMP467	MMETSP0725	Phot	NA	NA
Amphiprora sp. CCMP467	MMETSP0726	Phot	NA	NA
Amphiprora sp. CCMP467	MMETSP0727	Phot	NA	NA
Fragilariopsis kerguelensis L26-C5	MMETSP0733	Phot	NA	NA
Fragilariopsis kerguelensis L26-C5	MMETSP0734	Phot	NA	NA
Fragilariopsis kerguelensis L26-C5	MMETSP0735	Phot	NA	NA
Fragilariopsis kerguelensis L26-C5	MMETSP0736	Phot	NA	NA
Thalassiosira miniscula CCMP1093	MMETSP0737	Phot	NA	NA
Thalassiosira miniscula CCMP1093	MMETSP0738	Phot	NA	NA
Thalassiosira miniscula CCMP1093	MMETSP0739	Phot	NA	NA
Thalassiosira miniscula CCMP1093	MMETSP0740	Phot	NA	NA
Nitzschia punctata CCMP561	MMETSP0744	Phot	NA	NA
Nitzschia punctata CCMP561	MMETSP0745	Phot	NA	NA
Nitzschia punctata CCMP561	MMETSP0746	Phot	NA	NA
Nitzschia punctata CCMP561	MMETSP0747	Phot	NA	NA
Chaetoceros neogracile CCMP1317	MMETSP0751	Phot	NA	NA
Chaetoceros neogracile CCMP1317	MMETSP0752	Phot	NA	NA
Chaetoceros neogracile CCMP1317	MMETSP0753	Phot	NA	NA
Percolomonas cosmopolitus AE-1 (ATCC 50343)	MMETSP0758	Het	NA	Percolomonas cosmopolitus (Ruinen) n.gen., a new type of filter feeding flagellate from marine plankton. 1986. Fenchel and Patterson. J. Mar. Biol. Assoc. UK
Percolomonas cosmopolitus WS	MMETSP0759	Het	NA	Percolomonas cosmopolitus (Ruinen) n.gen., a new type of filter feeding flagellate from marine plankton. 1986. Fenchel and Patterson. J. Mar. Biol. Assoc. UK
Gambierdiscus australes CAWD 149	MMETSP0766	Phot	NA	Dinoflagellate diversity and abundance in two Belizean coral-reef mangrove lagoons: A test of Margalef’s mandala. 2005. Faust et al. Atoll Res. Bull.
Palpitomonas bilix NIES-2562	MMETSP0780	Het	NA	Palpitomonas bilix gen. et sp. nov.: A novel deep-branching heterotroph possibly related to Archaeplastida or Hacrobia. 2010. Yabuki et al. Protist.
Gymnodinium catenatum GC744	MMETSP0784	Mix	NA	Phagotrophy in Harmful Algae. 2006. Stoecker et al. Ecological Studies.
Bolidomonas pacifica CCMP 1866	MMETSP0785	Phot	NA	Photophysiology of Bolidomonas pacifica. 2013. Thomas and Campbell. J. Plankton Res.
Thalassionema frauenfeldii CCMP 1798	MMETSP0786	Phot	NA	NA
Alexandrium catenella OF101	MMETSP0790	Mix	NA	Mixotrophy in the newly described dinoflagellate Alexandrium pohangense: A specialist for feeding on the fast-swimming ichthyotoxic dinoflagellate Cochlodinium polykrikoides. 2015. Lim et al. Harmful Algae.
Stephanopyxis turris CCMP 815	MMETSP0794	Phot	NA	NA
Amoebophrya sp. Ameob2	MMETSP0795	Het	NA	NA
Pyrodinium bahamense pbaha01	MMETSP0796	Phot	NA	Bioluminescent cycle of photosynthetic dinoflagellates. 1966. Soli. Limnol. Oceanogr.
Dinophysis acuminata DAEP01	MMETSP0797	Mix	NA	Phagotrophy in Harmful Algae. 2006. Stoecker et al. Ecological Studies.
Geminigera cryophila CCMP2564	MMETSP0799	Mix	NA	Physiological Responses of Three Species of Antarctic Mixotrophic Phytoflagellates to Changes in Light and Dissolved Nutrients. 2014. McKie-Krisberg et al. Microbiol. Aq. Sys.
Striatella unipunctata CCMP2910	MMETSP0800	Phot	NA	NA
Micromonas sp. CCMP2099	MMETSP0802	Mix	NA	Mixotrophy in Chlorophytes and Haptophytes‚ Effect of Irradiance, Macronutrient, Micronutrient and Vitamin Limitation. 2018. Anderson et al. Front. Microbiol.
Prasinoderma coloniale CCMP1413	MMETSP0806	Phot	NA	Prasinoderma coloniale gen. et sp. nov., a new pelagic coccoid prasinophyte from the western Pacific Ocean. 1996. Hasegawa et al. Phycologia.
Dinobryon sp. UTEXLB2267	MMETSP0812	Mix	NA	Light-dependent phagotrophy in the freshwater mixotrophic chrysophyte Dinobryon cylindricum. 1993. Caron et al. Microbial Ecology.
Prymnesium parvum Texoma1	MMETSP0814	Mix	NA	NA
Prymnesium parvum Texoma1	MMETSP0815	Mix	NA	NA
Pseudo-nitzschia fraudulenta WWA7	MMETSP0850	Phot	NA	NA
Pseudo-nitzschia fraudulenta WWA7	MMETSP0852	Phot	NA	NA
Pseudo-nitzschia fraudulenta WWA7	MMETSP0853	Phot	NA	NA
Thalassiosira weissflogii CCMP1336	MMETSP0878	Phot	NA	NA
Thalassiosira weissflogii CCMP1336	MMETSP0879	Phot	NA	NA
Thalassiosira weissflogii CCMP1336	MMETSP0880	Phot	NA	NA
Thalassiosira weissflogii CCMP1336	MMETSP0881	Phot	NA	NA
Aureoumbra lagunensis CCMP1510	MMETSP0890	Phot	NA	Analyses of the complete chloroplast genome sequences of two members of the Pelagophyceae: Aureococcus anophagefferens CCMP1984 and Aureoumbra lagunensis CCMP1507. 2010. Ong et al. J. Phycol.
Aureoumbra lagunensis CCMP1510	MMETSP0891	Phot	NA	Analyses of the complete chloroplast genome sequences of two members of the Pelagophyceae: Aureococcus anophagefferens CCMP1984 and Aureoumbra lagunensis CCMP1507. 2010. Ong et al. J. Phycol.
Aureoumbra lagunensis CCMP1510	MMETSP0892	Phot	NA	Analyses of the complete chloroplast genome sequences of two members of the Pelagophyceae: Aureococcus anophagefferens CCMP1984 and Aureoumbra lagunensis CCMP1507. 2010. Ong et al. J. Phycol.
Aureoumbra lagunensis CCMP1510	MMETSP0893	Phot	NA	Analyses of the complete chloroplast genome sequences of two members of the Pelagophyceae: Aureococcus anophagefferens CCMP1984 and Aureoumbra lagunensis CCMP1507. 2010. Ong et al. J. Phycol.
Heterosigma akashiwo CCMP 452	MMETSP0894	Mix	NA	Phagotrophy in Harmful Algae. 2006. Stoecker et al. Ecological Studies.
Heterosigma akashiwo CCMP 452	MMETSP0895	Mix	NA	Phagotrophy in Harmful Algae. 2006. Stoecker et al. Ecological Studies.
Heterosigma akashiwo CCMP 452	MMETSP0896	Mix	NA	Phagotrophy in Harmful Algae. 2006. Stoecker et al. Ecological Studies.
Heterosigma akashiwo CCMP 452	MMETSP0897	Mix	NA	Phagotrophy in Harmful Algae. 2006. Stoecker et al. Ecological Studies.
Thalassiosira weissflogii CCMP1010	MMETSP0898	Phot	NA	NA
Thalassiosira weissflogii CCMP1010	MMETSP0899	Phot	NA	NA
Thalassiosira weissflogii CCMP1010	MMETSP0900	Phot	NA	NA
Thalassiosira weissflogii CCMP1010	MMETSP0901	Phot	NA	NA
Thalassiosira antarctica CCMP982	MMETSP0902	Phot	NA	NA
Thalassiosira antarctica CCMP982	MMETSP0903	Phot	NA	NA
Thalassiosira antarctica CCMP982	MMETSP0904	Phot	NA	NA
Thalassiosira antarctica CCMP982	MMETSP0905	Phot	NA	NA
Fragilariopsis kerguelensis L2-C3	MMETSP0906	Phot	NA	NA
Fragilariopsis kerguelensis L2-C3	MMETSP0907	Phot	NA	NA
Fragilariopsis kerguelensis L2-C3	MMETSP0908	Phot	NA	NA
Fragilariopsis kerguelensis L2-C3	MMETSP0909	Phot	NA	NA
Thalassiosira rotula GSO102	MMETSP0910	Phot	NA	NA
Thalassiosira rotula GSO102	MMETSP0911	Phot	NA	NA
Thalassiosira rotula GSO102	MMETSP0913	Phot	NA	NA
Aureococcus anophagefferens CCMP1850	MMETSP0914	Phot	NA	Analyses of the complete chloroplast genome sequences of two members of the Pelagophyceae: Aureococcus anophagefferens CCMP1984 and Aureoumbra lagunensis CCMP1507. 2010. Ong et al. J. Phycol.
Aureococcus anophagefferens CCMP1850	MMETSP0915	Phot	NA	Analyses of the complete chloroplast genome sequences of two members of the Pelagophyceae: Aureococcus anophagefferens CCMP1984 and Aureoumbra lagunensis CCMP1507. 2010. Ong et al. J. Phycol.
Aureococcus anophagefferens CCMP1850	MMETSP0916	Phot	NA	Analyses of the complete chloroplast genome sequences of two members of the Pelagophyceae: Aureococcus anophagefferens CCMP1984 and Aureoumbra lagunensis CCMP1507. 2010. Ong et al. J. Phycol.
Aureococcus anophagefferens CCMP1850	MMETSP0917	Phot	NA	Analyses of the complete chloroplast genome sequences of two members of the Pelagophyceae: Aureococcus anophagefferens CCMP1984 and Aureoumbra lagunensis CCMP1507. 2010. Ong et al. J. Phycol.
Skeletonema marinoi skelA	MMETSP0918	Phot	NA	NA
Skeletonema marinoi skelA	MMETSP0920	Phot	NA	NA
Ostreococcus mediterraneus clade-D-RCC2572	MMETSP0929	Phot	NA	Morphology, Genome Plasticity, and Phylogeny in the Genus Ostreococcus Reveal a Cryptic Species, O. mediterraneus sp. nov. (Mamiellales, Mamiellophyceae). 2013. Subirana et al. Protist.
Ostreococcus mediterraneus clade-D-RCC1621	MMETSP0930	Phot	NA	Morphology, Genome Plasticity, and Phylogeny in the Genus Ostreococcus Reveal a Cryptic Species, O. mediterraneus sp. nov. (Mamiellales, Mamiellophyceae). 2013. Subirana et al. Protist.
Ostreococcus mediterraneus clade-D-RCC2596	MMETSP0932	Phot	NA	Morphology, Genome Plasticity, and Phylogeny in the Genus Ostreococcus Reveal a Cryptic Species, O. mediterraneus sp. nov. (Mamiellales, Mamiellophyceae). 2013. Subirana et al. Protist.
Ostreococcus prasinos BCC99000	MMETSP0933	Phot	NA	Morphology, Genome Plasticity, and Phylogeny in the Genus Ostreococcus Reveal a Cryptic Species, O. mediterraneus sp. nov. (Mamiellales, Mamiellophyceae). 2013. Subirana et al. Protist.
Ostreococcus mediterraneus clade-D-RCC2573	MMETSP0936	Phot	NA	Morphology, Genome Plasticity, and Phylogeny in the Genus Ostreococcus Reveal a Cryptic Species, O. mediterraneus sp. nov. (Mamiellales, Mamiellophyceae). 2013. Subirana et al. Protist.
Ostreococcus mediterraneus clade-D-RCC1107	MMETSP0938	Phot	NA	Morphology, Genome Plasticity, and Phylogeny in the Genus Ostreococcus Reveal a Cryptic Species, O. mediterraneus sp. nov. (Mamiellales, Mamiellophyceae). 2013. Subirana et al. Protist.
Ostreococcus lucimarinus clade-A-BCC118000	MMETSP0939	Phot	NA	Morphology, Genome Plasticity, and Phylogeny in the Genus Ostreococcus Reveal a Cryptic Species, O. mediterraneus sp. nov. (Mamiellales, Mamiellophyceae). 2013. Subirana et al. Protist.
Cafeteria roenbergensis E4-10	MMETSP0942	Het	NA	Crash of a population of the marine heterotrophic flagellate Cafeteria roenbergensis by viral infection. 2007. Massana et al. Env. Microbiol.
Isochrysis galbana CCMP1323	MMETSP0943	Mix	NA	Mixotrophy in Chlorophytes and Haptophytes‚ Effect of Irradiance, Macronutrient, Micronutrient and Vitamin Limitation. 2018. Anderson et al. Front. Microbiol.
Isochrysis galbana CCMP1323	MMETSP0944	Mix	NA	Mixotrophy in Chlorophytes and Haptophytes‚ Effect of Irradiance, Macronutrient, Micronutrient and Vitamin Limitation. 2018. Anderson et al. Front. Microbiol.
Vaucheria litorea CCMP2940	MMETSP0945	Phot	NA	The acquisition of phototrophy: adaptive strategies of hosting endosymbionts and organelles. 2011. Johnson. Photosynthesis Res.
Vaucheria litorea CCMP2940	MMETSP0946	Phot	NA	The acquisition of phototrophy: adaptive strategies of hosting endosymbionts and organelles. 2011. Johnson. Photosynthesis Res.
Chattonella subsalsa CCMP2191	MMETSP0947	Mix	NA	Mixotrophy in Red Tide Algae Raphidophytes. 2011. Jeong. J. Euk. Microbiol.
Chattonella subsalsa CCMP2191	MMETSP0948	Mix	NA	Mixotrophy in Red Tide Algae Raphidophytes. 2011. Jeong. J. Euk. Microbiol.
Chattonella subsalsa CCMP2191	MMETSP0949	Mix	NA	Mixotrophy in Red Tide Algae Raphidophytes. 2011. Jeong. J. Euk. Microbiol.
Chattonella subsalsa CCMP2191	MMETSP0950	Mix	NA	Mixotrophy in Red Tide Algae Raphidophytes. 2011. Jeong. J. Euk. Microbiol.
Aplanochytrium sp PBS07	MMETSP0954	Het	NA	NA
Aplanochytrium sp PBS07	MMETSP0955	Het	NA	NA
Aplanochytrium sp PBS07	MMETSP0956	Het	NA	NA
Aplanochytrium sp PBS07	MMETSP0957	Het	NA	NA
Aurantiochytrium limacinum ATCCMYA-1381	MMETSP0958	Het	NA	NA
Aurantiochytrium limacinum ATCCMYA-1381	MMETSP0959	Het	NA	NA
Aurantiochytrium limacinum ATCCMYA-1381	MMETSP0960	Het	NA	NA
Aurantiochytrium limacinum ATCCMYA-1381	MMETSP0961	Het	NA	NA
Schizochytrium aggregatum ATCC28209	MMETSP0962	Het	NA	NA
Schizochytrium aggregatum ATCC28209	MMETSP0963	Het	NA	NA
Schizochytrium aggregatum ATCC28209	MMETSP0964	Het	NA	NA
Schizochytrium aggregatum ATCC28209	MMETSP0965	Het	NA	NA
Thalassiosira oceanica CCMP1005	MMETSP0970	Phot	NA	NA
Thalassiosira oceanica CCMP1005	MMETSP0971	Phot	NA	NA
Thalassiosira oceanica CCMP1005	MMETSP0972	Phot	NA	NA
Thalassiosira oceanica CCMP1005	MMETSP0973	Phot	NA	NA
Ditylum brightwellii GSO105	MMETSP0998	Phot	NA	NA
Ditylum brightwellii GSO105	MMETSP1001	Phot	NA	NA
Ditylum brightwellii GSO103	MMETSP1005	Phot	NA	NA
Ditylum brightwellii GSO104	MMETSP1010	Phot	NA	NA
Ditylum brightwellii GSO104	MMETSP1012	Phot	NA	NA
Ditylum brightwellii GSO104	MMETSP1013	Phot	NA	NA
Karlodinium micrum CCMP2283	MMETSP1015	Mix	NA	Phagotrophy in Harmful Algae. 2006. Stoecker et al. Ecological Studies.
Karlodinium micrum CCMP2283	MMETSP1016	Mix	NA	Phagotrophy in Harmful Algae. 2006. Stoecker et al. Ecological Studies.
Karlodinium micrum CCMP2283	MMETSP1017	Mix	NA	Phagotrophy in Harmful Algae. 2006. Stoecker et al. Ecological Studies.
Lingulodinium polyedra CCMP 1738	MMETSP1032	Mix	NA	Phagotrophy in Harmful Algae. 2006. Stoecker et al. Ecological Studies.
Lingulodinium polyedra CCMP 1738	MMETSP1033	Mix	NA	Phagotrophy in Harmful Algae. 2006. Stoecker et al. Ecological Studies.
Lingulodinium polyedra CCMP 1738	MMETSP1034	Mix	NA	Phagotrophy in Harmful Algae. 2006. Stoecker et al. Ecological Studies.
Lingulodinium polyedra CCMP 1738	MMETSP1035	Mix	NA	Phagotrophy in Harmful Algae. 2006. Stoecker et al. Ecological Studies.
Skeletonema marinoi FE7	MMETSP1039	Phot	NA	NA
Skeletonema marinoi FE60	MMETSP1040	Phot	NA	NA
Hemiselmis andersenii CCMP439	MMETSP1041	Phot	NA	NA
Hemiselmis andersenii CCMP1180	MMETSP1042	Phot	NA	NA
Hemiselmis andersenii CCMP441	MMETSP1043	Phot	NA	NA
Rhodomonas salina CCMP1319	MMETSP1047	Phot	NA	Light and temperature acclimation of Rhodomonas salina (Cryptophyceae): photosynthetic performance. 2002. Hammer et al. AME.
Proteomonas sulcata CCMP704	MMETSP1049	Phot	NA	NA
Cryptomonas curvata CCAP979/52	MMETSP1050	Phot	NA	Ultrastructure of the flagellar apparatus in Rhinomonas reticulata var. atrorosea (Cryptophyceae, Cryptophyta). 2013. Nam et al. Algae.
Bigelowiella natans CCMP623	MMETSP1052	Mix	NA	Ultrastructural studies on Bigelowiella natans, gen. et sp. nov., a chlorarachniophyte flagellate. 2001. Moestrup and Sengco. J. Phycol.
Bigelowiella natans CCMP1259	MMETSP1054	Mix	NA	Ultrastructural studies on Bigelowiella natans, gen. et sp. nov., a chlorarachniophyte flagellate. 2001. Moestrup and Sengco. J. Phycol.
Bigelowiella natans CCMP1258.1	MMETSP1055	Mix	NA	Ultrastructural studies on Bigelowiella natans, gen. et sp. nov., a chlorarachniophyte flagellate. 2001. Moestrup and Sengco. J. Phycol.
Detonula confervacea CCMP 353	MMETSP1058	Phot	NA	NA
Thalassiosira sp. FW	MMETSP1059	Phot	NA	NA
Pseudo-nitzschia pungens cf. cingulata	MMETSP1060	Phot	NA	NA
Pseudo-nitzschia pungens cf. pungens	MMETSP1061	Phot	NA	NA
Ditylum brightwellii Pop1 (SS4)	MMETSP1062	Phot	NA	NA
Ditylum brightwellii Pop2 (SS10)	MMETSP1063	Phot	NA	NA
Aulacoseira subarctica CCAP 1002/5	MMETSP1064	Phot	NA	NA
Amphiprora paludosa CCMP125	MMETSP1065	Phot	NA	NA
Coscinodiscus wailesii CCMP2513	MMETSP1066	Phot	NA	NA
Thalassiosira punctigera Tpunct2005C2	MMETSP1067	Phot	NA	NA
Pseudopedinella elastica CCMP716	MMETSP1068	Mix	NA	Presence, abundance and bacterivory of the mixotrophic algae Pseudopedinella (Dictyochophyceae) in freshwater environments. 2016. Gerea et al. AME.
Minutocellus polymorphus NH13	MMETSP1070	Phot	NA	NA
Thalassiosira sp. NH16	MMETSP1071	Phot	NA	NA
Micromonas sp CCMP1646	MMETSP1080	Phot	Ax	NA
Micromonas sp. NEPCC29	MMETSP1082	Mix	NA	Mixotrophy in Chlorophytes and Haptophytes‚ Effect of Irradiance, Macronutrient, Micronutrient and Vitamin Limitation. 2018. Anderson et al. Front. Microbiol.
Prymnesium parvum, Strain Texoma1	MMETSP1083	Het	Dark	NA
Micromonas sp. RCC472	MMETSP1084	Mix	NA	Mixotrophy in Chlorophytes and Haptophytes‚ Effect of Irradiance, Macronutrient, Micronutrient and Vitamin Limitation. 2018. Anderson et al. Front. Microbiol.
Pycnococcus sp CCMP1998	MMETSP1085	Phot	NA	Analysis of photosynthetic picoeukaryote diversity at open ocean sites in the Arabian Sea using a PCR biased towards marine algal plastids. 2006. Fuller et al. AME.
Rhodomonas sp. CCMP768	MMETSP1091	Phot	NA	Light and temperature acclimation of Rhodomonas salina (Cryptophyceae): photosynthetic performance. 2002. Hammer et al. AME.
Chrysochromulina brevifilum UTEX LB 985	MMETSP1094	Mix	NA	The relationship between photoacclimation and phagotrophy with respect to chlorophyll a, carbon and nitrogen content, and cell size of Chrysochromulina brevifilum (Prymnesiophyceae) 1995. Jones et al. Phycologia.
Chrysochromulina ericina CCMP281	MMETSP1096	Mix	NA	Mixotrophy in Chlorophytes and Haptophytes‚ Effect of Irradiance, Macronutrient, Micronutrient and Vitamin Limitation. 2018. Anderson et al. Front. Microbiol.
Phaeocystis antarctica Caron Lab Isolate	MMETSP1100	Phot	NA	The life cycle of Phaeocystis: state of knowledge and presumptive role in ecology. 2007. Rousseau et al. Biogeochemistry.
Cafeteria sp. Caron Lab Isolate	MMETSP1104	Het	NA	Feeding by heterotrophic dinoflagellates on the common marine heterotrophic nanoflagellate Cafeteria sp. 2007. Jeong et al. MEPS.
Ochromonas sp. BG-1	MMETSP1105	Mix	NA	Nutritional characteristics of a mixotrophic nanoflagellate, Ochromonas sp. 1989. Andersson et al. Microbial Ecology.
Mantoniella antarctica SL-175	MMETSP1106	Mix	NA	Mixotrophy in Chlorophytes and Haptophytes‚ Effect of Irradiance, Macronutrient, Micronutrient and Vitamin Limitation. 2018. Anderson et al. Front. Microbiol.
Dunaliella tertiolecta CCMP1320	MMETSP1127	Phot	Ax	NA
Dunaliella tertiolecta CCMP1320	MMETSP1128	Phot	Ax	NA
Pleurochrysis carterae CCMP645	MMETSP1136	Phot	Ax	NA
Pleurochrysis carterae CCMP645	MMETSP1137	Phot	Ax	NA
Pleurochrysis carterae CCMP645	MMETSP1138	Phot	Ax	NA
Pavlova sp. CCMP459	MMETSP1139	Phot	Ax	NA
Pavlova sp. CCMP459	MMETSP1140	Phot	Ax	NA
Picocystis salinarum CCMP1897	MMETSP1159	Phot	NA	NA
Pinguiococcus pyrenoidosus CCMP2078	MMETSP1160	Phot	NA	Pinguiococcus pyrenoidosus gen. et sp. nov. (Pinguiophyceae), a new marine coccoid alga. 2006. Andersen et al. Phycol. Res.
Phaeocystis Sp CCMP2710	MMETSP1162	Phot	NA	The life cycle of Phaeocystis: state of knowledge and presumptive role in ecology. 2007. Rousseau et al. Biogeochemistry.
Phaeomonas parva CCMP2877	MMETSP1163	Phot	NA	Ultrastructure and taxonomy of a marine photosynthetic stramenopile Phaeomonas parva gen. et sp. nov. (Pinguiophyceae) with emphasis on the flagellar apparatus architecture. 2006. Honda and Inouye. Phycol. Res.
Helicotheca tamensis CCMP826	MMETSP1171	Phot	NA	NA
Triceratium dubium CCMP147	MMETSP1175	Phot	NA	NA
Synedropsis recta cf CCMP1620	MMETSP1176	Phot	NA	NA
Ochromonas sp CCMP1899	MMETSP1177	Mix	NA	Nutritional characteristics of a mixotrophic nanoflagellate, Ochromonas sp. 1989. Andersson et al. Microbial Ecology.
Chlamydomonas cf sp CCMP681	MMETSP1180	Phot	NA	NA
Prasinoderma singularis RCC927	MMETSP1315	Phot	NA	NA
Pycnococcus provasolii RCC2336	MMETSP1316	Phot	NA	NA
Minutocellus polymorphus RCC2270	MMETSP1322	Phot	NA	NA
Micromonas pusilla RCC2306	MMETSP1327	Mix	NA	Mixotrophy in Chlorophytes and Haptophytes‚ Effect of Irradiance, Macronutrient, Micronutrient and Vitamin Limitation. 2018. Anderson et al. Front. Microbiol.
Chaetoceros cf. neogracile RCC1993	MMETSP1336	Phot	NA	NA
Fibrocapsa japonica CCMP1661	MMETSP1339	Mix	NA	Mixotrophy in Red Tide Algae Raphidophytes. 2011. Jeong. J. Euk. Microbiol.
Aplanochytrium stocchinoi GSBS06	MMETSP1347	Het	NA	NA
Aplanochytrium stocchinoi GSBS06	MMETSP1348	Het	NA	NA
Aplanochytrium stocchinoi GSBS06	MMETSP1349	Het	NA	NA
Stauroneis constricta CCMP1120	MMETSP1352	Phot	NA	NA
Bigelowiella natans CCMP1242	MMETSP1358	Mix	NA	Ultrastructural studies on Bigelowiella natans, gen. et sp. nov., a chlorarachniophyte flagellate. 2001. Moestrup and Sengco. J. Phycol.
Bigelowiella longifila CCMP242	MMETSP1359	Mix	NA	Ultrastructural studies on Bigelowiella natans, gen. et sp. nov., a chlorarachniophyte flagellate. 2001. Moestrup and Sengco. J. Phycol.
Licmophora paradoxa CCMP2313	MMETSP1360	Phot	NA	NA
Staurosira complex sp. CCMP2646	MMETSP1361	Phot	NA	NA
Leptocylindrus danicus CCMP1856	MMETSP1362	Phot	NA	NA
Pavlova sp. CCMP459	MMETSP1381	Phot	Ax	NA
Ammonia sp.	MMETSP1384	Het	NA	NA
Elphidium margaritaceum	MMETSP1385	Het	NA	NA
Micromonas sp. NEPCC29	MMETSP1386	Mix	NA	Mixotrophy in Chlorophytes and Haptophytes‚ Effect of Irradiance, Macronutrient, Micronutrient and Vitamin Limitation. 2018. Anderson et al. Front. Microbiol.
Micromonas sp. RCC472	MMETSP1387	Mix	NA	Mixotrophy in Chlorophytes and Haptophytes‚ Effect of Irradiance, Macronutrient, Micronutrient and Vitamin Limitation. 2018. Anderson et al. Front. Microbiol.
Rhodomonas sp. CCMP768	MMETSP1389	Phot	NA	Phycobiliprotein diffusion in chloroplasts of cryptophyte Rhodomonas CS24. 2009. Mirkovic et al. Photosynthesis Res.
Chlamydomonas leiostraca SAG 11-49	MMETSP1391	Phot	NA	NA
Chlamydomonas chlamydogama SAG 11-48b	MMETSP1392	Phot	NA	NA
Micromonas sp CS-222	MMETSP1393	Mix	NA	Mixotrophy in Chlorophytes and Haptophytes‚ Effect of Irradiance, Macronutrient, Micronutrient and Vitamin Limitation. 2018. Anderson et al. Front. Microbiol.
Asterionellopsis glacialis CCMP1581	MMETSP1394	Phot	NA	NA
Bathycoccus prasinos CCMP1898	MMETSP1399	Phot	NA	NA
Micromonas sp. RCC451	MMETSP1400	Mix	NA	Mixotrophy in Chlorophytes and Haptophytes‚ Effect of Irradiance, Macronutrient, Micronutrient and Vitamin Limitation. 2018. Anderson et al. Front. Microbiol.
Micromonas pusilla CCAC1681	MMETSP1401	Mix	NA	Mixotrophy in Chlorophytes and Haptophytes‚ Effect of Irradiance, Macronutrient, Micronutrient and Vitamin Limitation. 2018. Anderson et al. Front. Microbiol.
Micromonas pusilla RCC1614	MMETSP1402	Mix	NA	Mixotrophy in Chlorophytes and Haptophytes‚ Effect of Irradiance, Macronutrient, Micronutrient and Vitamin Limitation. 2018. Anderson et al. Front. Microbiol.
Micromonas pusilla CCMP1723	MMETSP1403	Mix	NA	Mixotrophy in Chlorophytes and Haptophytes‚ Effect of Irradiance, Macronutrient, Micronutrient and Vitamin Limitation. 2018. Anderson et al. Front. Microbiol.
Micromonas pusilla CCMP494	MMETSP1404	Mix	NA	Mixotrophy in Chlorophytes and Haptophytes‚ Effect of Irradiance, Macronutrient, Micronutrient and Vitamin Limitation. 2018. Anderson et al. Front. Microbiol.
Thalassiosira weissflogii CCMP1010	MMETSP1405	Phot	NA	NA
Thalassiosira weissflogii CCMP1010	MMETSP1406	Phot	NA	NA
Thalassiosira weissflogii CCMP1010	MMETSP1407	Phot	NA	NA
Thalassiosira weissflogii CCMP1010	MMETSP1408	Phot	NA	NA
Thalassiosira weissflogii CCMP1010	MMETSP1409	Phot	NA	NA
Thalassiosira weissflogii CCMP1010	MMETSP1410	Phot	NA	NA
Thalassiosira weissflogii CCMP1010	MMETSP1411	Phot	NA	NA
Thalassiosira weissflogii CCMP1010	MMETSP1413	Phot	NA	NA
Thalassiosira weissflogii CCMP1010	MMETSP1414	Phot	NA	NA
Thalassiosira weissflogii CCMP1010	MMETSP1415	Phot	NA	NA
Thalassiosira weissflogii CCMP1010	MMETSP1416	Phot	NA	NA
Thalassiosira weissflogii CCMP1010	MMETSP1417	Phot	NA	NA
Thalassiosira weissflogii CCMP1010	MMETSP1418	Phot	NA	NA
Thalassiosira weissflogii CCMP1010	MMETSP1419	Phot	NA	NA
Thalassiosira weissflogii CCMP1010	MMETSP1420	Phot	NA	NA
Thalassiosira weissflogii CCMP1010	MMETSP1421	Phot	NA	NA
Thalassiosira weissflogii CCMP1010	MMETSP1422	Phot	NA	NA
Pseudo-nitzschia heimii UNC1101	MMETSP1423	Phot	NA	NA
Oxyrrhis marina LB1974	MMETSP1424	Het	NA	Dynamics of herbivorous grazing by the heterotrophic dinoflagellate oxyrrhis marina. 1989. Goldman et al. J. Plankton Res.
Oxyrrhis marina LB1974	MMETSP1425	Het	NA	Dynamics of herbivorous grazing by the heterotrophic dinoflagellate oxyrrhis marina. 1989. Goldman et al. J. Plankton Res.
Oxyrrhis marina LB1974	MMETSP1426	Het	NA	Dynamics of herbivorous grazing by the heterotrophic dinoflagellate oxyrrhis marina. 1989. Goldman et al. J. Plankton Res.
Skeletonema marinoi UNC1201	MMETSP1428	Phot	NA	NA
Chaetoceros sp. UNC1202	MMETSP1429	Phot	NA	NA
Pseudo-nitzschia delicatissima UNC1205	MMETSP1432	Phot	NA	NA
Minutocellus polymorphus CCMP3303	MMETSP1434	Phot	NA	NA
Chaetoceros brevis CCMP164	MMETSP1435	Phot	NA	NA
Alexandrium andersonii CCMP2222	MMETSP1436	Mix	NA	Mixotrophic ability of the phototrophic dinoflagellates Alexandrium andersonii, A. affine, and A. fraterculus. 2016. Lee et al. Harmful Algae.
Eucampia antarctica CCMP1452	MMETSP1437	Phot	NA	NA
Pterosperma sp. CCMP1384	MMETSP1438	Phot	NA	NA
Polarella glacialis CCMP2088	MMETSP1440	Phot	NA	Heat shock effects and population survival in the polar dinoflagellate Polarella glacialis. 2012. Zheng et al. J. Exp. Mar. Bio. And Ecol.
Heterocapsa arctica CCMP445	MMETSP1441	Phot	Ax	NA
Craspedostauros australis CCMP3328	MMETSP1442	Phot	NA	NA
Entomoneis sp. CCMP2396	MMETSP1443	Phot	NA	NA
Phaeocystis antarctica CCMP1374	MMETSP1444	Phot	NA	The life cycle of Phaeocystis: state of knowledge and presumptive role in ecology. 2007. Rousseau et al. Biogeochemistry.
Chaetoceros dichaeta CCMP1751	MMETSP1447	Phot	NA	NA
Attheya septentrionalis CCMP2084	MMETSP1449	Phot	NA	NA
Pycnococcus provasolii, Strain RCC931	MMETSP1459	Phot	NA	NA
Bathycoccus prasinos RCC716	MMETSP1460	Phot	NA	NA
Mantoniella sp CCMP1436	MMETSP1468	Mix	NA	Mixotrophy in Chlorophytes and Haptophytes‚ Effect of Irradiance, Macronutrient, Micronutrient and Vitamin Limitation. 2018. Anderson et al. Front. Microbiol.
Pycnococcus provasolii RCC733	MMETSP1471	Phot	NA	NA
Pycnococcus provasolii, Strain RCC251	MMETSP1472	Phot	NA	NA
Stichococcus sp, Strain RCC1054	MMETSP1473	Phot	NA	NA
